# Supplementary material for: Molecular Basis for Vulnerability to Mitochondrial and Oxidative Stress in a Neuroendocrine CRI-G1 Cell Line
Source: PubMed Central journal article supplement (PMC3020905; doi:10.1371/journal.pone.0014485), 2011-01-04

Extracellular space

Plasma Membrane

Cytoplasm

Nucleus

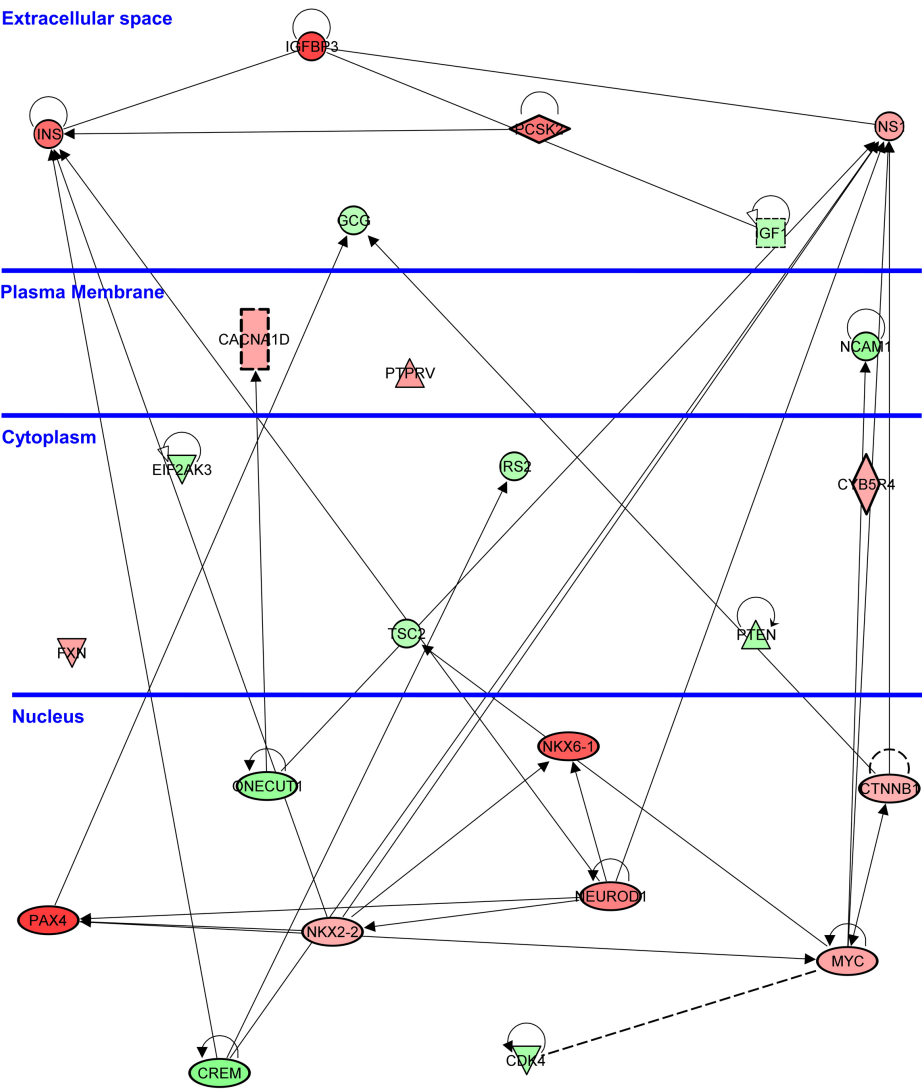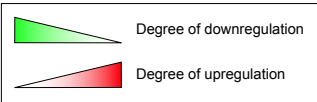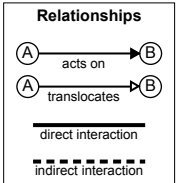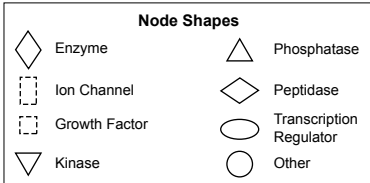

Supplement: pone.0014485.s007.pdf [file pone.0014485.s007.pdf]
