# Supplementary material for: Molecular Basis for Vulnerability to Mitochondrial and Oxidative Stress in a Neuroendocrine CRI-G1 Cell Line
Source: PLoS One. 2011 Jan 4;6(1):e14485. doi: 10.1371/journal.pone.0014485 (PMC3020905; doi:10.1371/journal.pone.0014485)
Supplement: Table S1 — (0.04 MB XLS) [file pone.0014485.s011.xls]

## Sheet: Sheet1
Supplemental Table S1. Statistically significant GO annotations (FDR-adjusted p-value < 0.05).
GO ID	Summary	Number changed	Number measured	FDR-adjusted p-value
GO:0050789	regulation of biological process	95	2537	1.58e-05
GO:0050791	regulation of physiological process	84	2212	4.53e-05
GO:0019752	carboxylic acid metabolism	24	387	8.18e-05
GO:0006082	organic acid metabolism	24	389	8.54e-05
GO:0007399	nervous system development	34	652	8.87e-05
GO:0048731	system development	34	682	0.000277
GO:0022008	neurogenesis	20	322	0.000509
GO:0050794	regulation of cellular process	80	2220	0.000623
GO:0051239	regulation of organismal physiological process	18	279	0.000645
GO:0042060	wound healing	12	109	0.000645
GO:0051244	regulation of cellular physiological process	74	2030	0.000843
GO:0000267	cell fraction	36	784	0.00114
GO:0048519	negative regulation of biological process	37	831	0.002
GO:0030154	cell differentiation	36	808	0.0025
GO:0004857	enzyme inhibitor activity	14	177	0.00405
GO:0008152	metabolism	131	4375	0.00699
GO:0046872	metal ion binding	50	1309	0.00803
GO:0043167	ion binding	50	1309	0.00803
GO:0000074	regulation of progression through cell cycle	18	324	0.00902
GO:0051726	regulation of cell cycle	18	325	0.00924
GO:0006984	ER-nuclear signaling pathway	4	13	0.0095
GO:0044237	cellular metabolism	123	4101	0.0109
GO:0006534	cysteine metabolism	3	6	0.0123
GO:0048699	generation of neurons	17	309	0.0144
GO:0005001	transmembrane receptor protein tyrosine phosphatase activity	4	15	0.015
GO:0019198	transmembrane receptor protein phosphatase activity	4	15	0.015
GO:0005624	membrane fraction	28	629	0.0155
GO:0048518	positive regulation of biological process	34	829	0.0214
GO:0050804	regulation of synaptic transmission	6	46	0.0254
GO:0051969	regulation of transmission of nerve impulse	6	46	0.0254
GO:0031644	regulation of neurophysiological process	6	46	0.0254
GO:0000096	sulfur amino acid metabolism	4	18	0.0261
GO:0009069	serine family amino acid metabolism	4	18	0.0261
GO:0004867	serine-type endopeptidase inhibitor activity	6	47	0.0261
GO:0006950	response to stress	36	909	0.0261
GO:0048522	positive regulation of cellular process	30	715	0.0261
GO:0045786	negative regulation of progression through cell cycle	8	86	0.0289
GO:0010001	glial cell differentiation	4	19	0.0289
GO:0030182	neuron differentiation	15	275	0.0289
GO:0007417	central nervous system development	12	179	0.0299
GO:0030968	unfolded protein response	3	9	0.0315
GO:0050803	regulation of synapse structure and function	6	50	0.0317
GO:0006520	amino acid metabolism	12	184	0.0359
GO:0031226	intrinsic to plasma membrane	37	966	0.0386
GO:0051242	positive regulation of cellular physiological process	27	639	0.0386
GO:0043119	positive regulation of physiological process	28	671	0.0386
GO:0044238	primary metabolism	116	3976	0.0412
GO:0048523	negative regulation of cellular process	30	742	0.0448
GO:0004142	diacylglycerol cholinephosphotransferase activity	2	3	0.0448
GO:0048002	antigen presentation, peptide antigen	2	3	0.0448
GO:0030432	peristalsis	2	3	0.0448
GO:0008273	calcium, potassium:sodium antiporter activity	2	3	0.0448
GO:0042995	cell projection	13	234	0.045
Blue highlight, cell metabolism; yellow highlight, neuronal differentiation or function.
